# Supplementary material
Source: MDPI journal article supplement (https://www.mdpi.com/2673-1924/3/3/28)
Supplement: s1 [file s1]

## Household Survey

|               |            |                  |                   |
|---------------|------------|------------------|-------------------|
| VILLAGE _____ | DATE _____ | RESPONDENT _____ | INTERVIEWER _____ |
|---------------|------------|------------------|-------------------|

### Respondent background information

|   |                                                       |               |         |           |          |       |       |       |       |         |       |       |     |
|---|-------------------------------------------------------|---------------|---------|-----------|----------|-------|-------|-------|-------|---------|-------|-------|-----|
| 1 | <b>Gender</b>                                         | Male          | Female  |           |          |       |       |       |       |         |       |       |     |
| 2 | <b>Age</b>                                            | 15-18         | 19-24   | 25-30     | 31-35    | 36-40 | 41-45 | 46-50 | 51-55 | 56-60   | 61-65 | 66-70 | 71+ |
| 3 | <b>Marital Status</b>                                 | Never married | Married | Separated | Divorced |       |       |       |       | Widowed |       |       |     |
| 4 | <b>How many years have you lived in this village?</b> | < 1           | 2-3     | 4-6       | 7-10     | 11-15 | 16-20 | 21-25 | 25+   |         |       |       |     |

### Household Characteristics

|   |                                                                                           |           |             |                           |
|---|-------------------------------------------------------------------------------------------|-----------|-------------|---------------------------|
| 5 | How many families live in your household?                                                 |           |             |                           |
| 6 | How many people live in your household?                                                   | Men _____ | Women _____ | Children ____             |
| 7 | Does <b>any</b> member of your household own:                                             | Canoe     | Motorboat   | Fishing net    Fish fence |
| 8 | What benefits does your household <b>currently</b> get from marine and coastal resources? | Income    | Food        | Both                      |

### Occupation of household members

|   |                                                                                                                                                                                                            |                                                                                                                                                                                                                                                                                                                                                                                               |
|---|------------------------------------------------------------------------------------------------------------------------------------------------------------------------------------------------------------|-----------------------------------------------------------------------------------------------------------------------------------------------------------------------------------------------------------------------------------------------------------------------------------------------------------------------------------------------------------------------------------------------|
| 9 | In what ways does your household make money? (circle all that apply)<br><br><b>What is <u>main</u> occupation? (underline)</b><br><br><b>Rank: most income</b><br><br><b>Rank: most important for food</b> | Fishing    Fish culture    Boat operation/sea transport<br>d Gleaning    e Surabi    f Middleman    g Seaweed cultivation<br>h Baking    i Wood trader    j Trader (other)    k Miner (coral/inland)<br>l Landlord    m Carpenter/Labour    n Tourism employee<br>o Artisan/crafts    p Transport (land)    q Civil servant    r Teacher<br>s Farmer (produce) _____ t Other    u Not working |
|---|------------------------------------------------------------------------------------------------------------------------------------------------------------------------------------------------------------|-----------------------------------------------------------------------------------------------------------------------------------------------------------------------------------------------------------------------------------------------------------------------------------------------------------------------------------------------------------------------------------------------|

### Marine and Coastal Resource Use

|    |                                                                                                                      |                                                                                       |
|----|----------------------------------------------------------------------------------------------------------------------|---------------------------------------------------------------------------------------|
| 10 | What marine/coastal products do you <b>collect</b> yourself (or <b>trade</b> if trader/middleman)?                   | Fish/Shark/Octopus/Sea cucumber    Other invertebrate _____<br>Coral/Mangrove/Seaweed |
| 11 | What habitat do you fish/collect from? (seagrass/Coral Reef/mangrove/other)                                          |                                                                                       |
| 12 | What habitat do you prefer to fish/collect from? (if multiple) (if seagrass, ask why do you like using the seagrass) |                                                                                       |
| 13 | What do you do with your collection?    s Sell    e Eat    b Both                                                    |                                                                                       |
| 14 | Where do you sell your collection? Market/middleman                                                                  |                                                                                       |
| 15 | How often do you collect?                                                                                            |                                                                                       |
| 16 | What method do you use?                                                                                              |                                                                                       |
| 17 | What is the best season? In which season(s) do you get most money/food for your collection?                          |                                                                                       |
| 18 | How has your income/food from this activity changed in the past 5 years?    b Better    w Worse    nc No change      |                                                                                       |
| 19 | What do you think are the reasons for this?                                                                          |                                                                                       |

### Diet

|    |                                        |      |         |      |               |       |
|----|----------------------------------------|------|---------|------|---------------|-------|
| 20 | What is the food you eat <b>most</b> ? | Rice | Cassava | Fish | Other seafood | Other |
|----|----------------------------------------|------|---------|------|---------------|-------|

|    |                                                          |                          |                 |                 |                |                        |
|----|----------------------------------------------------------|--------------------------|-----------------|-----------------|----------------|------------------------|
| 21 | How many times in a week do you eat fish?                | None<br>Every meal       | 1-2             | 3-4             | 5-6            | Every day [times/day ] |
| 22 | What are the 5 most important fish for food?             | 1<br>4                   |                 |                 | 2<br>5         | 3                      |
| 23 | What are the five most important invertebrates for food? | 1<br>4                   |                 |                 | 2<br>5         | 3                      |
| 24 | How often do you eat meat?                               | Never<br>1-2 times/month | 1-2 times/ week |                 | 3-4 times/week |                        |
| 25 | What meat do you eat?                                    | a Chicken                |                 | b Goat          |                | c Cow                  |
| 26 | How often do you eat eggs?                               | Never<br>1-2 times/month | Every day       | 1-2 times/ week |                | 3-4 times/week         |
| 27 | Do you eat any of these foods?                           | Cashew nuts              | Other nuts      | Seeds           | Milk           | Fruit Vegetables       |

### Financial questions

|    |                                                      |       |            |                   |
|----|------------------------------------------------------|-------|------------|-------------------|
| 28 | How much money does your household make in one year? | _____ | Don't know | Don't want to say |
|----|------------------------------------------------------|-------|------------|-------------------|

### Seagrass Knowledge

|    |                                                                                                   |   |   |   |
|----|---------------------------------------------------------------------------------------------------|---|---|---|
| 29 | Why is seagrass important?                                                                        |   |   |   |
| 30 | What does the seagrass provide for you?                                                           |   |   |   |
| 31 | What is seagrass (plant/animal/algae)?                                                            |   |   |   |
| 32 | What can damage seagrass?                                                                         |   |   |   |
| 33 | <u>I will read a list of statements.</u> Tell me if you agree (a), disagree (b) or don't know (c) | a | b | c |
| a  | There is less fish and marine life than there was 5 years ago                                     |   |   |   |
| b  | Fish are smaller now than they were 5 years ago                                                   |   |   |   |
| c  | Damaging the marine environment now will make our lives more difficult in the future              |   |   |   |
| d  | Seagrass is an important place for us to find food                                                |   |   |   |
| e  | Sea cucumbers are smaller now than they were 5 years ago                                          |   |   |   |
| f  | Mangroves are not important                                                                       |   |   |   |
| g  | Shells (invertebrates) are smaller now than they were 5 years ago                                 |   |   |   |
| i  | Seagrass beds are not important                                                                   |   |   |   |
| j  | Too many fish are being taken                                                                     |   |   |   |
| k  | Seagrass is very important to people here                                                         |   |   |   |
| l  | Gleaning is threatening the plants and animals here                                               |   |   |   |
| m  | Seagrass will be here forever                                                                     |   |   |   |
| n  | Seagrass is being damaged here                                                                    |   |   |   |
| o  | Seagrass is an important habitat for fish                                                         |   |   |   |
| p  | Seagrass is affected by seaweed farming                                                           |   |   |   |
